# Supplementary material for: LINE-1 and Alu methylation signatures in autism spectrum disorder and their function in the regulation of autism-related genes
Source: Research Square preprint supplement (doi:10.21203/rs.3.rs-1194570/v2), 2022-02-16
Supplement: Supplementary file 4 [file d15f1a11de59bd6ad31e67f2.docx]

Table S2 Diseases and biological functions associated with DMGs related LINE-1 and Alu methylation signatures in ASD with 16p11.2del variant predicted by the Ingenuity Pathway Analysis (IPA)

| Name | P-value | #Genes |
| --- | --- | --- |
| Diseases and Disorders | | |
| Hematological system development and function | 3.72E-02 - 2.63E-04 | 4 |
| Inflammatory response | 3.93E-02 - 2.63E-04 | 13 |
| Cancer | 3.93E-02 - 9.29E-04 | 47 |
| Developmental disorder | 3.93E-02 - 2.22E-03 | 9 |
| Endocrine system disorders | 3.93E-02 - 2.22E-03 | 38 |
| Neurological disease category | | |
| Primary ciliary dyskinesia type 39 | 2.22E-03 | 1 |
| Susceptibility to generalized epilepsy with febrile seizures plus type 5 | 2.22E-03 | 1 |
| Familial advanced sleep phase syndrome type 3 | 2.22E-03 | 1 |
| Glutaric acidemia type 2A | 2.22E-03 | 1 |
| Congenital fibrosis of extraocular muscles type 3A | 2.22E-03 | 1 |
| Ingenuity Canonical Pathways | | |
| Axonal Guidance Signaling | 4.47E-03 | 5 |
| Semaphorin Signaling in Neurons | 7.59E-03 | 2 |
| Gustation Pathway | 9.55E-03 | 3 |
| mTOR Signaling | 1.05E-02 | 3 |
| Sirtuin Signaling Pathway | 2.51E-02 | 3 |
